# Supplementary material for: SPOP Deregulation Improves the Radiation Response of Prostate Cancer Models by Impairing DNA Damage Repair
Source: MDPI journal article supplement (doi:10.3390/cancers12061462), 2020-06-04
Supplement: s1 [file s1]

**Supplementary Table 1. Plating efficiency values of DU145 and PC-3 cells transfected with WT or mutant SPOP**

| <b>Cells</b>        | <b>Plating Efficiency *</b> |               |
|---------------------|-----------------------------|---------------|
|                     | <b>DU145</b>                | <b>PC-3</b>   |
| <b>Empty</b> vector | 0.196 ± 0.002 **            | 0.253 ± 0.013 |
| <b>WT</b> SPOP      | 0.196 ± 0.004               | 0.246 ± 0.018 |
| <b>Y87N</b> SPOP    | 0.176 ± 0.009               | 0.179 ± 0.005 |
| <b>K129E</b> SPOP   | 0.175 ± 0.004               | 0.179 ± 0.004 |
| <b>F133V</b> SPOP   | 0.172 ± 0.001               | 0.178 ± 0.016 |

\* N° of colonies/N° of plated cells

\*\* Mean value ± SD from 3 independent experiments
