# Supplementary figures and images for: SPOP Deregulation Improves the Radiation Response of Prostate Cancer Models by Impairing DNA Damage Repair
Source: MDPI journal article supplement (doi:10.3390/cancers12061462), 2020-06-04

Figure 3C

---

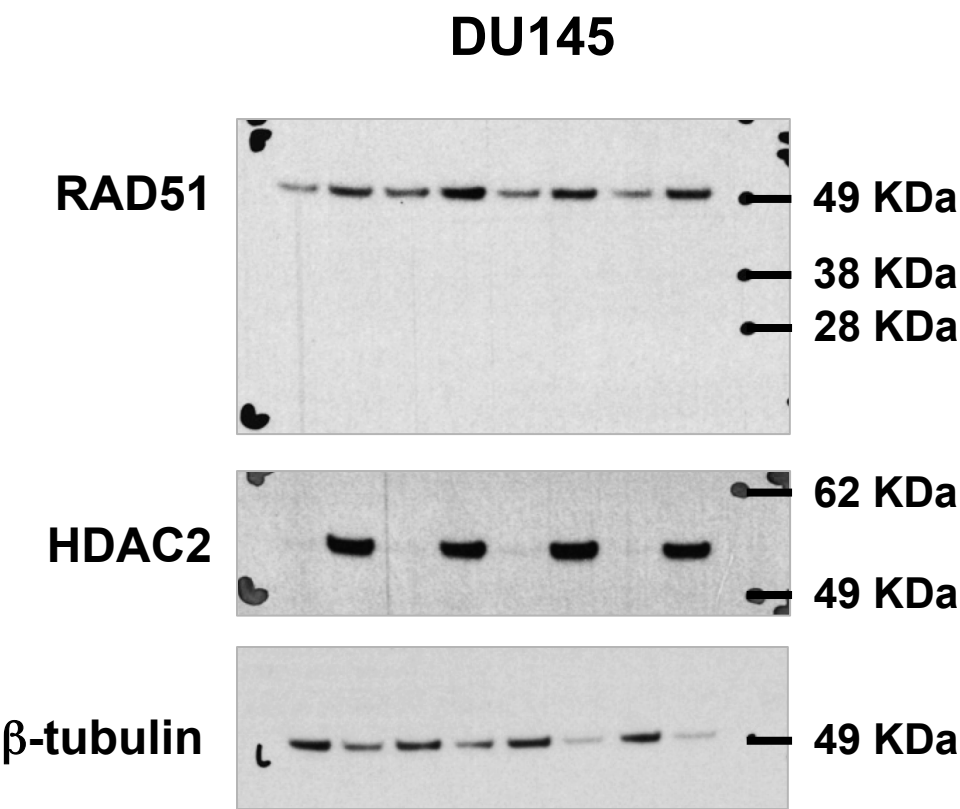

**Figure 4B**

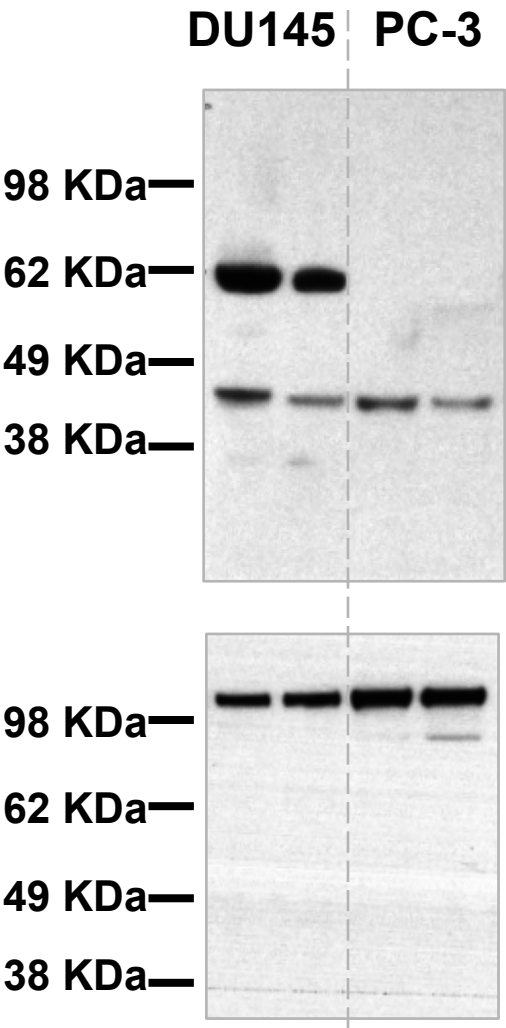

**Figure 4F**

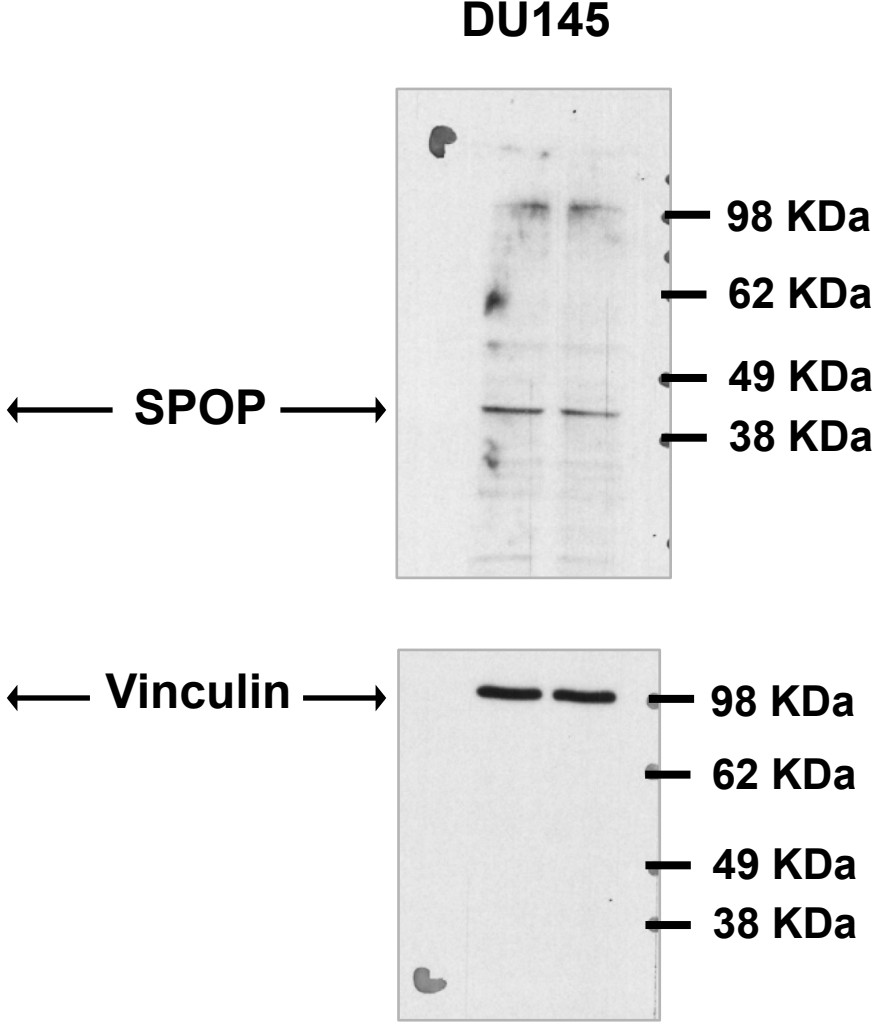

Figure 5B

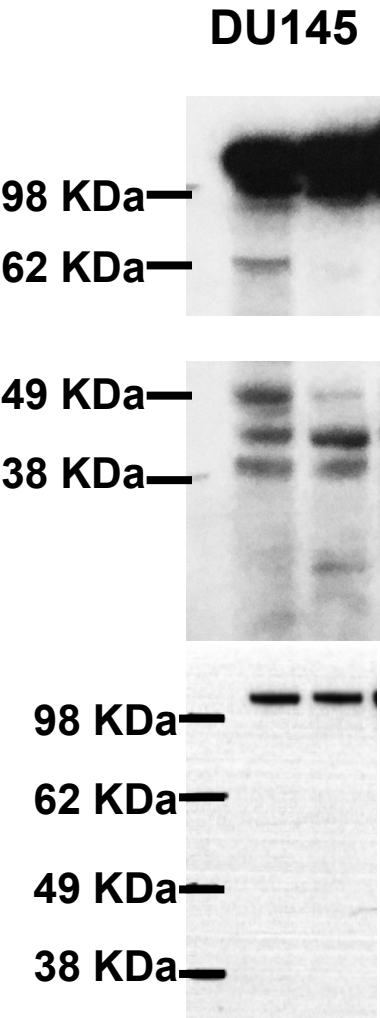

Figure 5B

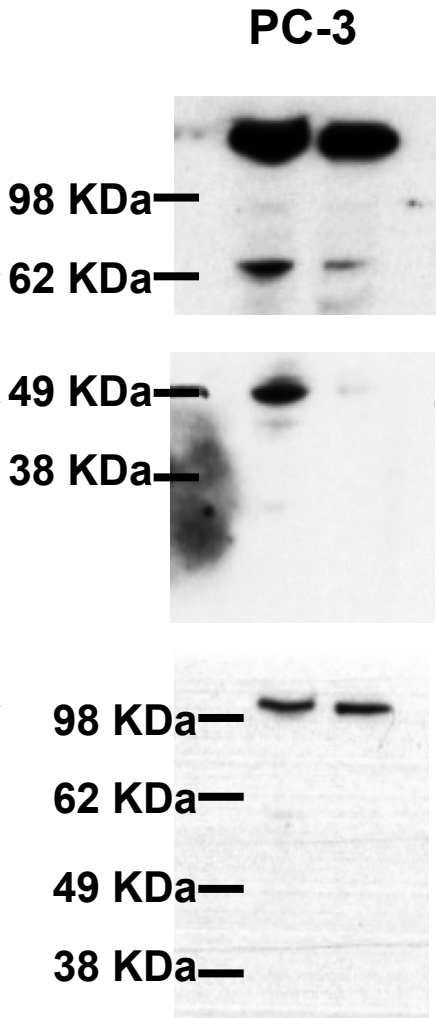

Supplement: s1 [file s1]
